# Supplementary material
Source: PubMed Central journal article supplement (PMC2719360)
Supplement: M109.004457_1.pdf [file M109.004457_1.pdf]

## SUPPLEMENTARY FIGURE LEGENDS

### **Figure 1S. Annexin A6 fusion proteins maintain the properties of native annexin A6.**

(A) and (B) HEK293 cells expressing annexin A6YFP-tH and GFP-tH were mixed, and homogenized in the presence of 0.2 mM  $\text{Ca}^{2+}$ . Lysates were extracted with 0.5% Triton X-100 (TX-100) and fractionated on a discontinuous 5-30% flotation sucrose gradient in 0.2 mM  $\text{Ca}^{2+}$ , as shown. Fractions were collected from the top of the gradient and analyzed by SDS-PAGE and Western blotting with (A) anti-GFP MAbs or (B) anti-annexin A6 and anti-RhoA MAbs. Graphs show the distribution of annexin A6YFP-tH, GFP-tH, endogenous annexin A6 and RhoA in gradient fractions, expressed as % of the total protein.

(C) Gradient fractionation of HEK293 cell lysates containing annexin A6YFP-tK and GFP-tK was performed as described in (A and B) and analyzed by Western Blotting with anti-GFP MAbs. Low-density membrane fractions 3 and 4; soluble proteins in 40% sucrose fraction 8, pellet fraction 9P.

### **Figure 2S. PM-localized annexin A6 reduces EGF-stimulated $\text{Ca}^{2+}$ entry into A431 cells.**

A431 cells were transiently transfected with annexin A6YFP-tH or mCherry-tH constructs, co-cultured and stimulated with 100 ng EGF in the presence of 2 mM  $\text{Ca}^{2+}$ . (A) shows a representative recording of 5 cells each in the same field and (B) an average of 3 independent experiments ( $n = 9$  coverslips),  $*p < 0.05$ .

### **Figure 3S. Annexin A2 does not influence $\text{Ca}^{2+}$ entry in annexin A2YFP-tH cells**

(A) Annexin A2 was expressed as a fusion with YFP and the H-Ras anchor sequence. Live HEK293 cells producing A2YFP-tH were analyzed by confocal microscopy under resting conditions, and after stimulation with 2 mM  $\text{Ca}^{2+}$  - 5  $\mu\text{M}$  ionomycin. Annexin A2YFP-tH was targeted to the PM at rest, and at high  $\text{Ca}^{2+}$ . Bar = 5  $\mu\text{m}$ .

(B) Annexin A2YFP-tH expressing cells were co-cultured with mCherry-tH control, loaded with Fluo-3/AM and stimulated with 10  $\mu\text{M}$  carbachol (CCh), followed by SERCA inhibition with 1  $\mu\text{M}$  thapsigargin (TG), and activation of SOCE with 2 mM and 5 mM  $[\text{Ca}^{2+}]_{\text{ex}}$ . In a representative experiment, responses in mCherry-tH- expressing cells (control, black line) were compared to annexin A2YFP-tH cells (grey line).

(C) The graph shows an average of 4 independent experiments ( $n=16$  fields)  $\pm$  SEM. There was no statistically significant difference between the responses in annexin A2YFP-tH cells compared to the mCherry-tH control.

### **Figure 4S. Re-loading with 3 mM $\text{Ca}^{2+}$ restores the ER contents in annexin A6YFP-tH cells**

(A) A typical recording of SOCE stimulation from co-cultured A6YFP-tH and mCherry-tH cells, incubated in  $\text{Ca}^{2+}$ -free buffer. ER  $[\text{Ca}^{2+}]$  levels are reduced compared to the control.

(B) Same cells as in (A) pre-incubated in 3 mM  $[\text{Ca}^{2+}]_{\text{ex}}$  for 2 h. Immediately before the experiment, cells were perfused with  $\text{Ca}^{2+}$ -free buffer, and TG-induced SOCE stimulated.

(C) Graph shows average of 4 independent experiments  $\pm$  SEM ( $n=8$  coverslips for control,  $n=11$  coverslips for reloaded cells),  $*p < 0.05$ .

### **Figure 5S. Annexin A6 binds purified actomyosin**

Smooth muscle actomyosin and annexin A6 were purified as described (58). The absence of lipid contamination in both preparations was confirmed by thin-layer chromatography.

Purified annexin A6 (**Anx 6**; 2  $\mu\text{g}$  of protein) was recombined with the indicated amounts of purified actomyosin (**AM**) in NCS buffer (120 mM KCl, 20 mM imidazol, pH 7.0) (final volume = 40  $\mu\text{l}$ ) containing 1 mM EGTA and 1.2 mM  $\text{CaCl}_2$  (+) or 1mM EGTA alone (-). The samples were incubated for 10 minutes at ambient temperature. Pellets obtained after centrifugation at 12 000 x g for 30 minutes were made up to a final volume of 40  $\mu\text{l}$  with NCS buffer. Equal aliquots of the resulting pellets (**pel**) and supernatants (**sup**) were analyzed by SDS-PAGE.

**A**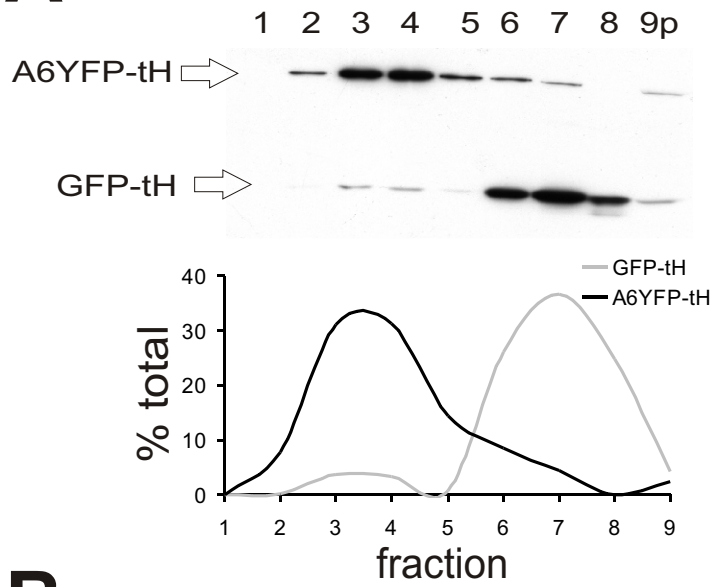**B**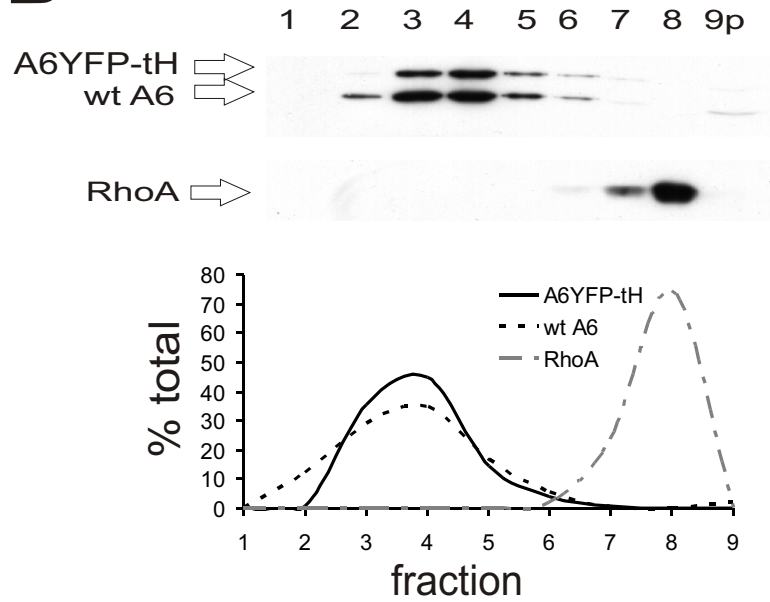**C**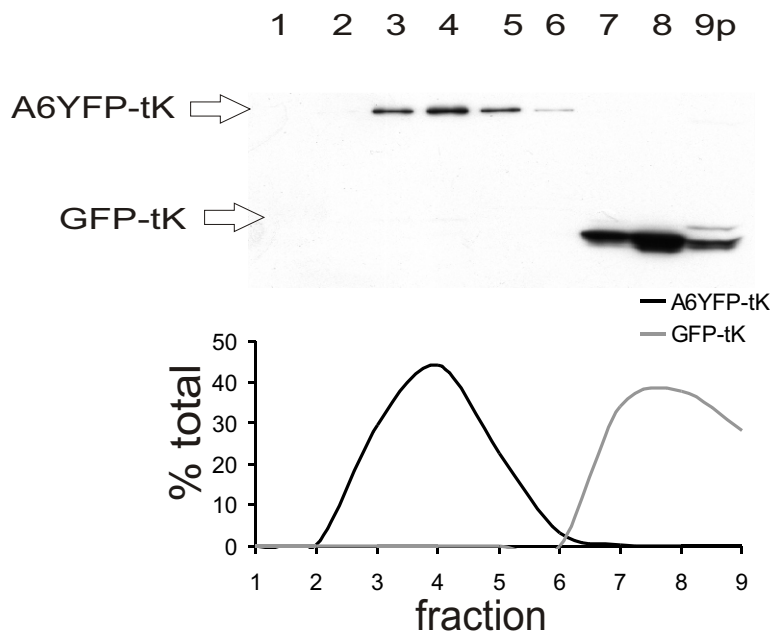

Fig. 1S

**A**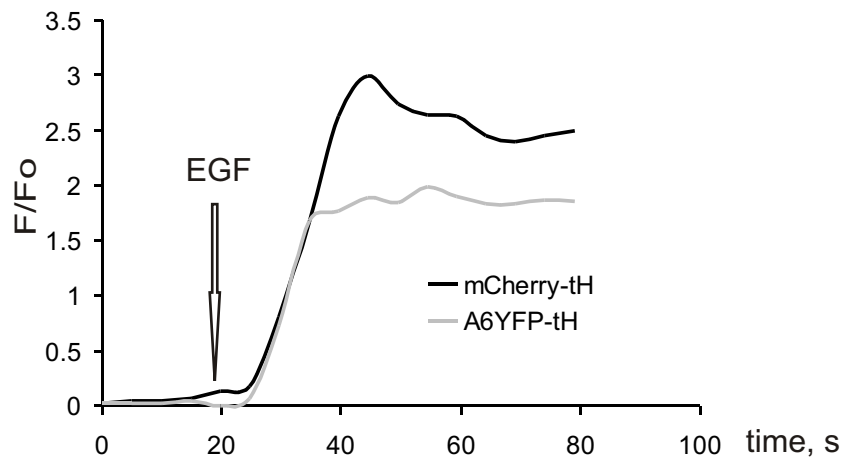**B**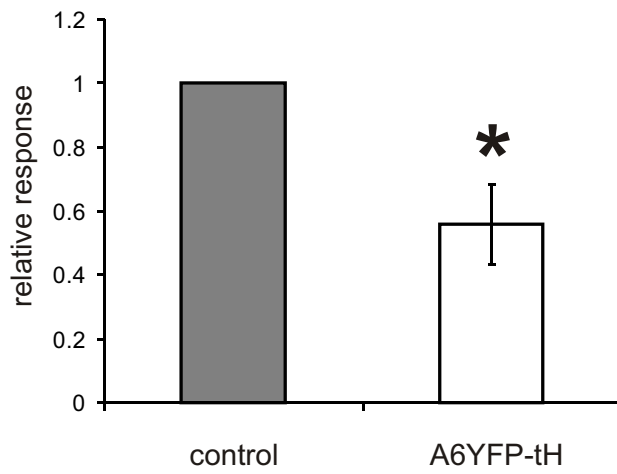

**A**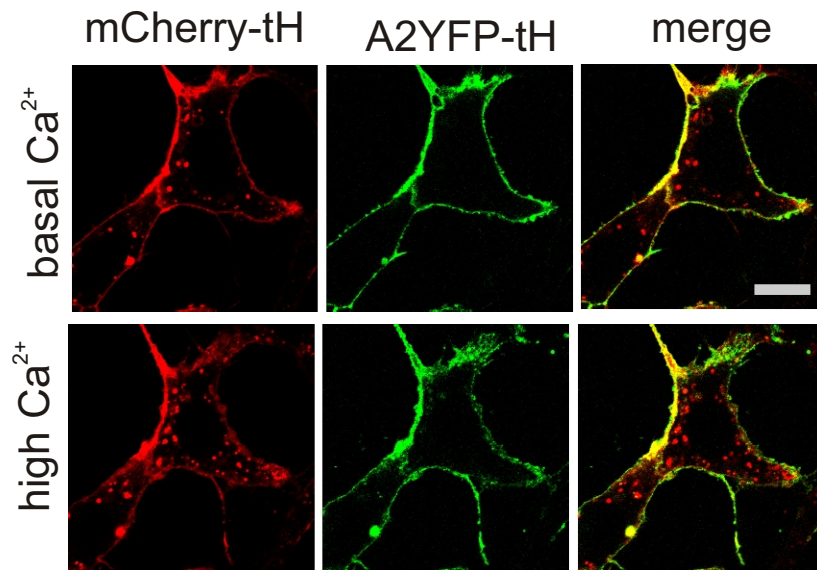**B**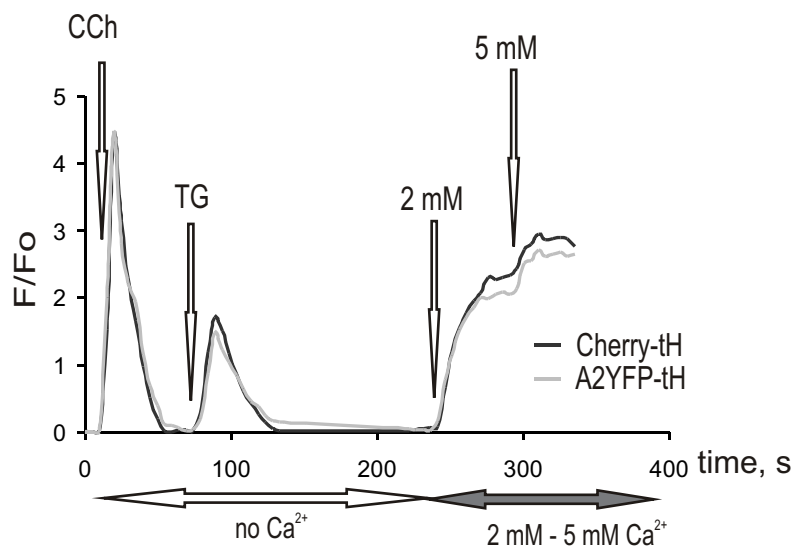**C**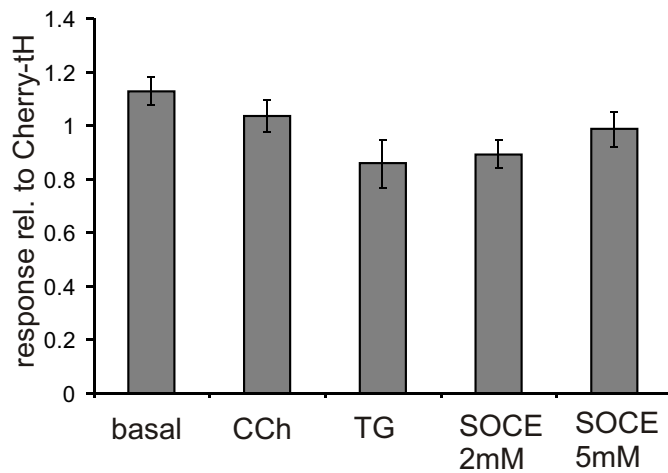

Fig. 3S

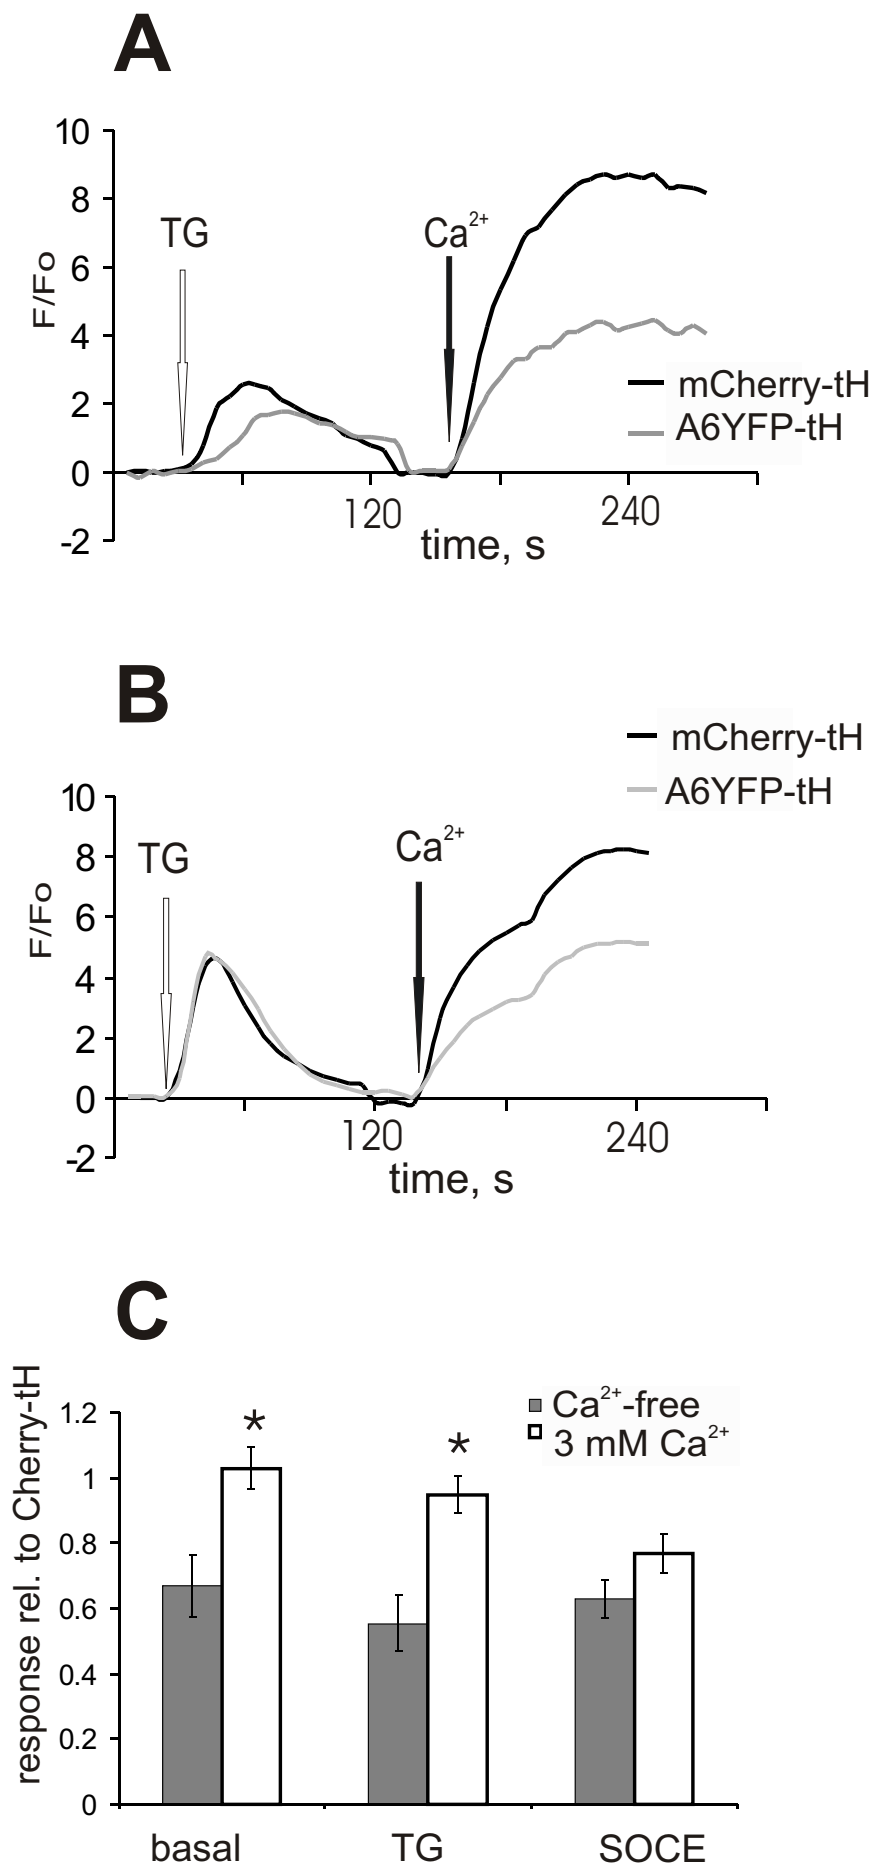

Fig. 4S

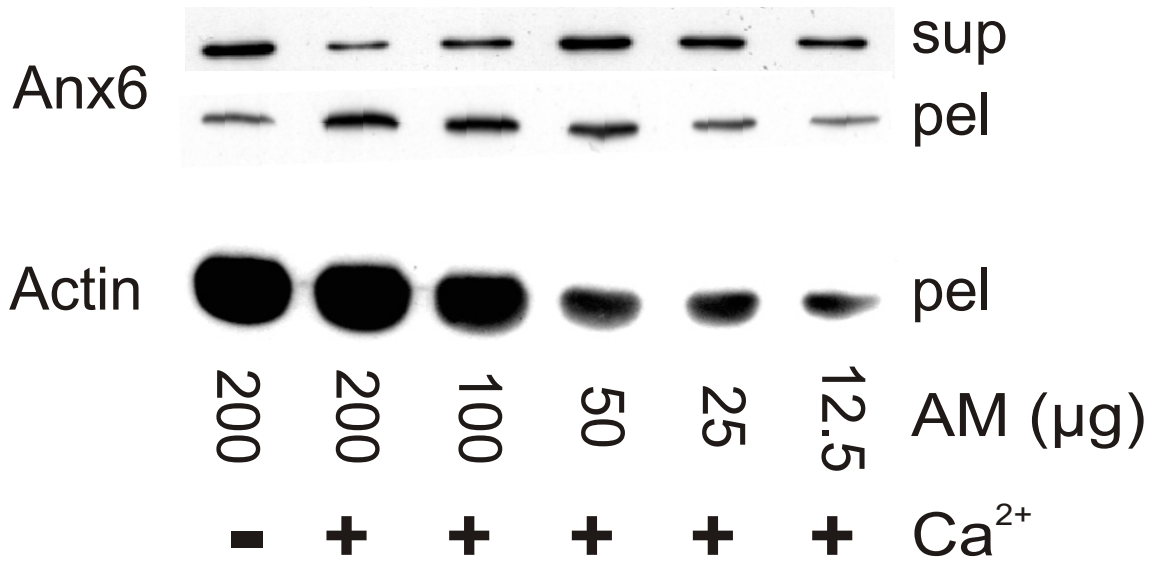

Fig. 5S
